# Supplementary material for: Impact of adjuvant: Trivalent vaccine with quadrivalent-like protection against heterologous Yamagata-lineage influenza B virus
Source: PubMed Central journal article supplement (PMC9561127; doi:10.3389/fimmu.2022.1002286), 2022-09-30
Supplement: DataSheet_1.pdf [file DataSheet_1.pdf]

## Supplementary Material

### Supplementary Figures

| Victoria Lineage (B-V)   |                                |                                                                                                                                                                                                                                                                                                                                                                                                                                                                                                                                                                                                                                |
|--------------------------|--------------------------------|--------------------------------------------------------------------------------------------------------------------------------------------------------------------------------------------------------------------------------------------------------------------------------------------------------------------------------------------------------------------------------------------------------------------------------------------------------------------------------------------------------------------------------------------------------------------------------------------------------------------------------|
| Use                      | Strain                         | Sequence                                                                                                                                                                                                                                                                                                                                                                                                                                                                                                                                                                                                                       |
| Vaccine                  | B/Maryland/15/2016             | MKAIIVLLMVVTSNADRICTGITSNSPHVVKATQGEVNVTVGVIPLTTPTKSHFANLKGTRGKLCPC<br>KCLNCTDLVALGRPKCTGKIPARSVILHEVRPVTSGCFPIIMHRTKIRQLPNLLRGYEHVRLSTHNV<br>NAEADAGPGPYKIGTSGSCPNIITNGNGFFATMAWAVPDKNKATNPLTIEVPYCTEGEDQITVWGFHSDN<br>EIQMAKLYGDSKPKQFTSSANGVTTHYVSIQIGFNPQTEDGGLPQSGRIVVDYMQKSGKTGTITYQRG<br>LLPQKVVWCASGRSKVIKGSPLIGEADCLHEKYGGLNKSPPYTGHEHAKAIGNCPIWVKTPKLANGTKY<br>RPPAKLLKERGGFAGIAGFLEGGWEGMIAGWGHYTSHGAGHVAVAADLKSTQEAINKITKNLSLELE<br>VKNLQRLSGAMDELHNEILEDEKVDLDRADTSSQIELAVLLSNEGIINSEDEHLLALERLKKMLGSPA<br>VEIGNGCFETKHKCNQTCLDRIAAGTFDAGEFSLPTFDSLNTAASLNDGDLNHTILLYSTAASSLAV<br>VTLMIAIFVVMVSRDINVSCISCL        |
|                          | B/Iowa/06/2017                 | MKAIIVLLMVVTSNADRICTGITSNSPHVVKATQGEVNVTVGVIPLTTPTKSHFANLKGTRGKLCPC<br>KCLNCTDLVALGRPKCTGKIPARSVILHEVRPVTSGCFPIIMHRTKIRQLPNLLRGYEHVRLSTHNV<br>NAEAGAPGGPYKIGTSGSCPNIITNGNGFFATMAWAVPDKNKATNPLTIEVPYCTEGEDQITVWGFHSDN<br>ETQMAKLYGDSKPKQFTSSANGVTTHYVSIQIGFNPQTEDGGLPQSGRIVVDYMQKSGKTGTITYQRG<br>LLPQKVVWCASGRSKVIKGSPLIGEADCLHEKYGGLNKSPPYTGHEHAKAIGNCPIWVKTPKLANGTKY<br>RPPAKLLKERGGFAGIAGFLEGGWEGMIAGWGHYTSHGAGHVAVAADLKSTQEAINKITKNLSLELE<br>VKNLQRLSGAMDELHNEILEDEKVDLDRADTSSQIELAVLLSNEGIINSEDEHLLALERLKKMLGSPA<br>VEIGNGCFETKHKCNQTCLDRIAAGTFDAGEFSLPTFDSLNTAASLNDGDLNHTILLYSTAASSLAV<br>VTLMIAIFVVMVSRDINVSCISCL        |
| ELISA                    | B/Brisbane/60/2008             | MKAIIVLLMVVTSNADRICTGITSNSPHVVKATQGEVNVTVGVIPLTTPTKSHFANLKGTRGKLCPC<br>KCLNCTDLVALGRPKCTGKIPARSVILHEVRPVTSGCFPIIMHRTKIRQLPNLLRGYEHVRLSTHNV<br>NAENAGPGPYKIGTSGSCPNIITNGNGFFATMAWAVPDKNKATNPLTIEVPYCTEGEDQITVWGFHS<br>DNEAQMAYLYGDSKPKQFTSSANGVTTHYVSIQIGFNPQTEDGGLPQSGRIVVDYMQKSGKTGTITYQR<br>GILLPQKVVWCASGRSKVIKGSPLIGEADCLHEKYGGLNKSPPYTGHEHAKAIGNCPIWVKTPKLANGTK<br>YRPPAKLLKERGGFAGIAGFLEGGWEGMIAGWGHYTSHGAGHVAVAADLKSTQEAINKITKNLSLELE<br>VKNLQRLSGAMDELHNEILEDEKVDLDRADTSSQIELAVLLSNEGIINSEDEHLLALERLKKMLGSPA<br>SAVEIGNGCFETKHKCNQTCLDRIAAGTFDAGEFSLPTFDSLNTAASLNDGDLNHTILLYSTAASSL<br>AVTLMIAIFVVMVSRDINVSCISCL       |
| Neutralization           | B/Colorado/06/2017             | MKAIIVLLMVVTSNADRICTGITSNSPHVVKATQGEVNVTVGVIPLTTPTKSHFANLKGTRGKLCPC<br>KCLNCTDLVALGRPKCTGKIPARSVILHEVRPVTSGCFPIIMHRTKIRQLPNLLRGYEHVRLSTHNV<br>NAEAGAPGGPYKIGTSGSCPNIITNGNGFFATMAWAVPDKNKATNPLTIEVPYCTEGEDQITVWGFHSDN<br>ETQMAKLYGDSKPKQFTSSANGVTTHYVSIQIGFNPQTEDGGLPQSGRIVVDYMQKSGKTGTITYQRG<br>LLPQKVVWCASGRSKVIKGSPLIGEADCLHEKYGGLNKSPPYTGHEHAKAIGNCPIWVKTPKLANGTKY<br>RPPAKLLKERGGFAGIAGFLEGGWEGMIAGWGHYTSHGAGHVAVAADLKSTQEAINKITKNLSLELE<br>VKNLQRLSGAMDELHNEILEDEKVDLDRADTSSQIELAVLLSNEGIINSEDEHLLALERLKKMLGSPA<br>VEIGNGCFETKHKCNQTCLDRIAAGTFDAGEFSLPTFDSLNTAASLNDGDLNHTILLYSTAASSLAV<br>VTLMIAIFVVMVSRDINVSCISCL        |
| Yamagata Lineage (B-Y)   |                                |                                                                                                                                                                                                                                                                                                                                                                                                                                                                                                                                                                                                                                |
| Use                      | Strain                         | Sequence                                                                                                                                                                                                                                                                                                                                                                                                                                                                                                                                                                                                                       |
| Vaccine                  | B/Singapore/INFIT-16-0610/2016 | MVVTSNADRICTGITSNSPHVVKATQGEVNVTVGVIPLTTPTKSYFANLKGTRTRGKLCPCD<br>CLNCTDLVALGRPMCVGTTSPAKASILHEVRPVTSGCFPIIMHRTKIRQLPNLLRGYEKIRLSTQNV<br>DAEKAPGGPYRLGTSGSCP NATSKIGFFATMAWAVPDKNYKNATNPQTEVEVPYCTEGEDQITVWGFHSDN<br>KTQMKSLYGDSNPKQFTSSANGVTTHYVSIQIGFNPQTEDGGLPQSGRIVVDYMQKSGKTGTITYQRG<br>VLLPQKVVWCASGRSKVIKGSPLIGEADCLHEEYGLNKSPPYTGHEHAKAIGNCPIWVKTPKLANGTKY<br>YRPPAKLLKERGGFAGIAGFLEGGWEGMIAGWGHYTSHGAGHVAVAADLKSTQEAINKITKNLSLELE<br>VKNLQRLSGAMDELHNEILEDEKVDLDRADTSSQIELAVLLSNEGIINSEDEHLLALERLKKMLGSPA<br>AVDIGNCFETKHKCNQTCLDRIAAGTFNAGEFSLPTFDSLNTAASLNDGDLNHTILLYSTAASSLA<br>VTLMIAIFVVMVSRDINVSCISCL           |
| ELISA/<br>Neutralization | B/Phuket/3073/2013             | MKAIIVLLMVVTSNADRICTGITSNSPHVVKATQGEVNVTVGVIPLTTPTKSYFANLKGTRTRGKLCPC<br>DCLNCTDLVALGRPMCVGTTSPAKASILHEVRPVTSGCFPIIMHRTKIRQLPNLLRGYEKIRLSTQNV<br>DAEKAPGGPYRLGTSGSCP NATSKIGFFATMAWAVPDKNYKNATNPQTEVEVPYCTEGEDQITVWGFHSDN<br>KTQMKSLYGDSNPKQFTSSANGVTTHYVSIQIGFNPQTEDGGLPQSGRIVVDYMQKSGKTGTITYQRG<br>VLLPQKVVWCASGRSKVIKGSPLIGEADCLHEEYGLNKSPPYTGHEHAKAIGNCPIWVKTPKLANGTKY<br>YRPPAKLLKERGGFAGIAGFLEGGWEGMIAGWGHYTSHGAGHVAVAADLKSTQEAINKITKNLSLELE<br>VKNLQRLSGAMDELHNEILEDEKVDLDRADTSSQIELAVLLSNEGIINSEDEHLLALERLKKMLGSPA<br>AVDIGNCFETKHKCNQTCLDRIAAGTFNAGEFSLPTFDSLNTAASLNDGDLNHTILLYSTAASSLA<br>VTLMIAIFVVMVSRDINVSCISCL   |
| Challenge                | B/Florida/04/2006              | MKAIIVLLMVVTSNADRICTGITSNSPHVVKATQGEVNVTVGVIPLTTPTKSYFANLKGTRTRGKLCPC<br>DCLNCTDLVALGRPMCVGTTSPAKASILHEVVPVTSGCFPIIMHRTKIRQLPNLLRGYENIRLSTQNV<br>DAEKAPGGPYRLGTSGSCP NATSKIGFFATMAWAVPDKNYKNATNPQTEVEVPYCTEGEDQITVWGFHSD<br>DKTQMKNLYGDSNPKQFTSSANGVTTHYVSIQIGFNPQTEDGGLPQSGRIVVDYMQKSGKTGTITYQRG<br>VLLPQKVVWCASGRSKVIKGSPLIGEADCLHEKYGGLNKSPPYTGHEHAKAIGNCPIWVKTPKLANGTKY<br>YRPPAKLLKERGGFAGIAGFLEGGWEGMIAGWGHYTSHGAGHVAVAADLKSTQEAINKITKNLSLELE<br>VKNLQRLSGAMDELHNEILEDEKVDLDRADTSSQIELAVLLSNEGIINSEDEHLLALERLKKMLGSPA<br>AVEIGNGCFETKHKCNQTCLDRIAAGTFNAGEFSLPTFDSLNTAASLNDGDLNHTILLYSTAASSLA<br>VTLMIAIFVVMVSRDINVSCISCL |

**Supplementary Fig. S1. Sequences of influenza B viral HA proteins used in this study.** Sequences are for influenza B HA in commercial vaccines, and proteins/viruses used in ELISA and neutralization assays and challenge experiments. Sequences were downloaded from different databases such the NCBI GenBank. Influenza B HA of Victoria lineage is denoted as B-V, while Influenza B HA of Yamagata-lineage is denoted as B-Y.

These are all the pairwise sequence identity percentages (from chimera), and also attached is a graphic of the multiple sequence alignment.

AGM53847.1 hemagglutinin [Influenza B virus (B/Florida/04/2006)] vs. AGM53847.1 hemagglutinin [Influenza B virus (B/Florida/04/2006)]: 100.00% identity  
 AGM53847.1 hemagglutinin [Influenza B virus (B/Florida/04/2006)] vs. ANC28539.1 hemagglutinin [Influenza B virus (B/Brisbane/60/2008)]: 93.49% identity  
 AGM53847.1 hemagglutinin [Influenza B virus (B/Florida/04/2006)] vs. ASW32353.1 hemagglutinin [Influenza B virus (B/Maryland/15/2016)]: 92.97% identity  
 AGM53847.1 hemagglutinin [Influenza B virus (B/Florida/04/2006)] vs. AQY15026.1 hemagglutinin [Influenza B virus (B/Iowa/06/2017)]: 93.14% identity  
 AGM53847.1 hemagglutinin [Influenza B virus (B/Florida/04/2006)] vs. ASK81305.1 hemagglutinin [Influenza B virus (B/Colorado/06/2017)]: 92.97% identity  
 ANC28539.1 hemagglutinin [Influenza B virus (B/Brisbane/60/2008)] vs. AGM53847.1 hemagglutinin [Influenza B virus (B/Florida/04/2006)]: 93.49% identity  
 ANC28539.1 hemagglutinin [Influenza B virus (B/Brisbane/60/2008)] vs. ANC28539.1 hemagglutinin [Influenza B virus (B/Brisbane/60/2008)]: 100.00% identity  
 ANC28539.1 hemagglutinin [Influenza B virus (B/Brisbane/60/2008)] vs. ASW32353.1 hemagglutinin [Influenza B virus (B/Maryland/15/2016)]: 99.14% identity  
 ANC28539.1 hemagglutinin [Influenza B virus (B/Brisbane/60/2008)] vs. AQY15026.1 hemagglutinin [Influenza B virus (B/Iowa/06/2017)]: 99.14% identity  
 ANC28539.1 hemagglutinin [Influenza B virus (B/Brisbane/60/2008)] vs. ASK81305.1 hemagglutinin [Influenza B virus (B/Colorado/06/2017)]: 98.97% identity  
 ASW32353.1 hemagglutinin [Influenza B virus (B/Maryland/15/2016)] vs. AGM53847.1 hemagglutinin [Influenza B virus (B/Florida/04/2006)]: 92.97% identity  
 ASW32353.1 hemagglutinin [Influenza B virus (B/Maryland/15/2016)] vs. ANC28539.1 hemagglutinin [Influenza B virus (B/Brisbane/60/2008)]: 99.14% identity  
 ASW32353.1 hemagglutinin [Influenza B virus (B/Maryland/15/2016)] vs. ASW32353.1 hemagglutinin [Influenza B virus (B/Maryland/15/2016)]: 100.00% identity  
 ASW32353.1 hemagglutinin [Influenza B virus (B/Maryland/15/2016)] vs. AQY15026.1 hemagglutinin [Influenza B virus (B/Iowa/06/2017)]: 99.66% identity  
 ASW32353.1 hemagglutinin [Influenza B virus (B/Maryland/15/2016)] vs. ASK81305.1 hemagglutinin [Influenza B virus (B/Colorado/06/2017)]: 99.49% identity  
 AQY15026.1 hemagglutinin [Influenza B virus (B/Iowa/06/2017)] vs. AGM53847.1 hemagglutinin [Influenza B virus (B/Florida/04/2006)]: 93.14% identity  
 AQY15026.1 hemagglutinin [Influenza B virus (B/Iowa/06/2017)] vs. ANC28539.1 hemagglutinin [Influenza B virus (B/Brisbane/60/2008)]: 99.14% identity  
 AQY15026.1 hemagglutinin [Influenza B virus (B/Iowa/06/2017)] vs. ASW32353.1 hemagglutinin [Influenza B virus (B/Maryland/15/2016)]: 99.66% identity  
 AQY15026.1 hemagglutinin [Influenza B virus (B/Iowa/06/2017)] vs. AQY15026.1 hemagglutinin [Influenza B virus (B/Iowa/06/2017)]: 100.00% identity  
 AQY15026.1 hemagglutinin [Influenza B virus (B/Iowa/06/2017)] vs. ASK81305.1 hemagglutinin [Influenza B virus (B/Colorado/06/2017)]: 99.83% identity  
 ASK81305.1 hemagglutinin [Influenza B virus (B/Colorado/06/2017)] vs. AGM53847.1 hemagglutinin [Influenza B virus (B/Florida/04/2006)]: 92.97% identity  
 ASK81305.1 hemagglutinin [Influenza B virus (B/Colorado/06/2017)] vs. ANC28539.1 hemagglutinin [Influenza B virus (B/Brisbane/60/2008)]: 98.97% identity  
 ASK81305.1 hemagglutinin [Influenza B virus (B/Colorado/06/2017)] vs. ASW32353.1 hemagglutinin [Influenza B virus (B/Maryland/15/2016)]: 99.49% identity  
 ASK81305.1 hemagglutinin [Influenza B virus (B/Colorado/06/2017)] vs. AQY15026.1 hemagglutinin [Influenza B virus (B/Iowa/06/2017)]: 99.83% identity  
 ASK81305.1 hemagglutinin [Influenza B virus (B/Colorado/06/2017)] vs. ASK81305.1 hemagglutinin [Influenza B virus (B/Colorado/06/2017)]: 100.00% identity

**Supplementary Fig. S2. Sequence comparison and sequence accession numbers of influenza B viral HA proteins used in this study.** Accession numbers and strain names are given with the percent identity at the end of each line for the sequence comparison.

(A) Binding to HA1 B/Brisbane/60/2008 (Victoria Lineage)

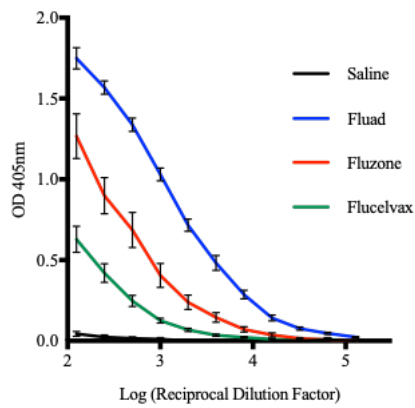

(B) Binding to HA1 B/Phuket/3073/2013 (Yamagata Lineage)

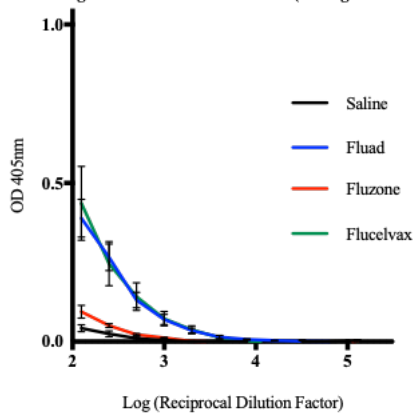

(C) Binding to HA0 B/Phuket/3073/2013 (Yamagata Lineage)

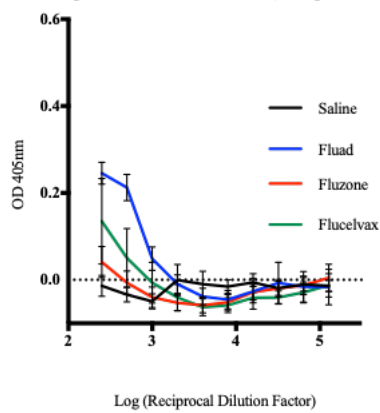

**Supplementary Fig. S3. Dilution curves of the antibody binding from vaccinated mouse sera to influenza B HA1 proteins.** Serially diluted sera from mice immunized with commercial vaccines Flud (T), Flucelvax (Q), and Fluzone (T) were analyzed by ELISA for binding to antigenically matched and mismatch influenza HA1 proteins representing (A) B/Brisbane/60/08 (Victoria-lineage), (B) B/Phuket/307/13 (Yamagata lineage) viruses.

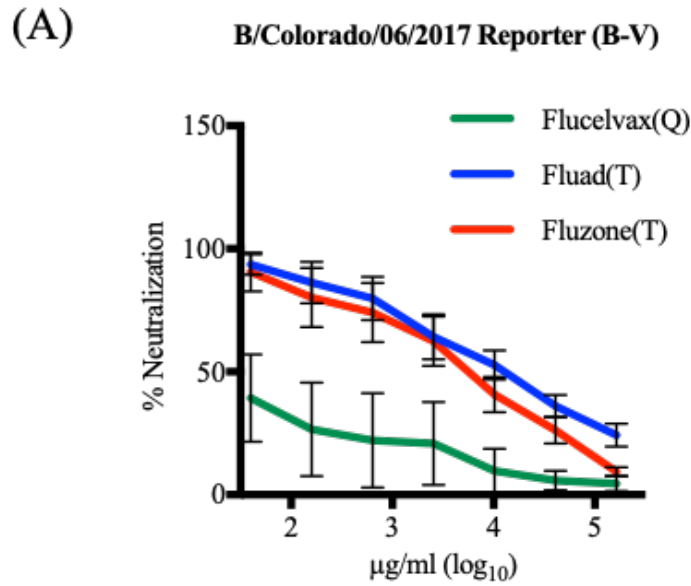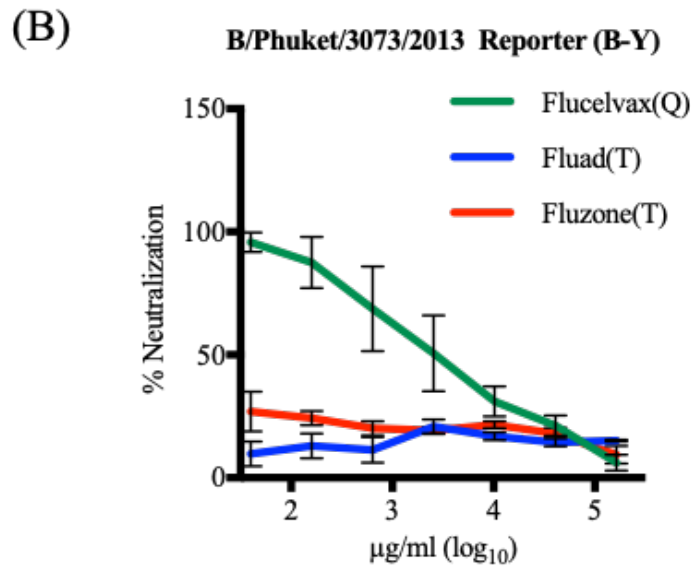

**Supplementary Fig. S4. Titration curves for neutralization of influenza B reporter viruses by sera from mice immunized with commercial influenza vaccines.** Reporter influenza B viruses were (A) B/Colorado/17 (B-V) and (B) B/Phuket/307/13 (B-Y). Influenza B HA of Victoria lineage is denoted as B-V, while Influenza B HA of Yamagata-lineage is denoted as B-Y.

(A)

| <b>Histologic Score</b>                         |                                                                                                                                                                                                         |
|-------------------------------------------------|---------------------------------------------------------------------------------------------------------------------------------------------------------------------------------------------------------|
| Bronchiole lumina                               | Exudate in bronchiole lumina. None (score 0 points), Exudate present (score 1 point); moderate (score 2 points); Severe-partial to complete occlusion of 1 or more central bronchioles (score 3 points) |
| Terminal bronchiole lumina                      | Exudate in terminal bronchiolar lumina. None (score 0 points), mild (score 1 point), moderate (score 2 points), Severe-partial to complete occlusion of 1 or more central bronchioles (score 3 points)  |
| Bronchiolar/TB epithelial necrosis/degeneration | None (score 0 points); Mild (score 1 point); Moderate (score 2 points); Severe (score 3 points)                                                                                                         |
| Perivascular inflammation/fibrin                | None (score 0 points); Mild (score 1 point); Moderate (score 2 points); Severe (score 3 points)                                                                                                         |
| Alveoli/interstitium edema                      | None (score 0 points); <25% (score 1 point); 25-50% (score 2 points); >50% (score 3 points)                                                                                                             |
| Alveoli inflammatory cells                      | None-few (score 0 points); mild increase (score 1 point); moderate (score 2 points); Marked (score 3 points)                                                                                            |
| Interstitial inflammatory cells                 | None-few (score 0 points); mild increase (score 1 point); moderate (score 2 points); Marked (score 3 points)                                                                                            |
| Anywhere: hemorrhage/necrosis/fibrin            | None (score 0 points); up to 5% of section (score 1 point); 5-50% of section (score 2 points); >50% of section (score 3 points)                                                                         |

(B)

| <b>Influenza B Immunohistochemical Score</b>                             |                                                                                                 |
|--------------------------------------------------------------------------|-------------------------------------------------------------------------------------------------|
| Trachea and bronchiolar epithelium                                       | None (score 0 points), Up to 5% (score 1 point), 5-50% (score 2 points), >50% (score 3 points)  |
| Terminal bronchiolar epithelium                                          | None (score 0 points), Up to 5% (score 1 point), 5-50% (score 2 points), >50% (score 3 points)  |
| Alveolar septa (with immunoreactive interstitial cells) immunoreactivity | None (score 0 points); up to 5% (score 1 point), 5-50% (score 2 points), >50 % (score 3 points) |
| Bronchiolar exudate                                                      | Immunostaining absent (score 0 points); Immunostaining present score 1 point)                   |
| Alveolar exudate (+/- immunoreactive alveolar macrophages)               | Immunostaining absent (score 0 points); Immunostaining present score 1 point)                   |

**Supplementary Fig. S5. Scoring rubrics for pathology of lungs in mice challenged with influenza.** (A) Histologic scoring. (B) Influenza B immunohistochemical scoring. Yamagata-lineage challenge virus was mouse-adapted B/Florida/04/2006.
